# Supplementary material
Source: PubMed Central journal article supplement (PMC9115675)
Supplement: pkac027_supplementary_data.pdf [file pkac027_supplementary_data.pdf]

Supplementary Table 1. Association of bile acids (BAs) with colorectal cancer (n=495 cases [n=233 women and n=262 men]; n=495 matched controls<sup>b</sup>) in the PLCO Study by sex

| BA                         | Sex   |                          | BA Quartile      |                  |                   |                  | Trend Test |         | Continuous<br>log <sub>2</sub> [BA] | Interaction<br>Test for Sex<br>P-value <sup>c</sup> |
|----------------------------|-------|--------------------------|------------------|------------------|-------------------|------------------|------------|---------|-------------------------------------|-----------------------------------------------------|
|                            |       |                          | 1 (Ref)          | 2                | 3                 | 4                | P-value    | Q-value |                                     |                                                     |
| Primary unconjugated BAs   |       |                          |                  |                  |                   |                  |            |         |                                     |                                                     |
| CDCA (ng/mL)               |       |                          | <8.08            | 8.08 to <26.30   | 26.30 to <81.30   | ≥81.30           |            |         |                                     | 0.01                                                |
|                            | Women | N cases (%)              | 57 (24.5)        | 63 (27.0)        | 53 (22.8)         | 60 (25.8)        |            |         |                                     |                                                     |
|                            |       | OR (95% CI) <sup>a</sup> | 1.00             | 1.50 (0.87-2.58) | 1.73 (0.94-3.15)  | 1.61 (0.87-2.96) | 0.11       | 0.21    | 1.10 (1.01-1.20)                    |                                                     |
|                            | Men   | N cases (%)              | 65 (24.8)        | 58 (22.1)        | 67 (25.6)         | 72 (27.5)        |            |         |                                     |                                                     |
|                            |       | OR (95% CI) <sup>a</sup> | 1.00             | 0.66 (0.37-1.19) | 0.50 (0.28-0.88)  | 0.63 (0.35-1.14) | 0.10       | 0.19    | 0.94 (0.87-1.02)                    |                                                     |
| CA (ng/mL)                 |       |                          | <3.53            | 3.53 to <9.39    | 9.39 to <30.70    | ≥30.70           |            |         |                                     | 0.006                                               |
|                            | Women | N cases (%)              | 65 (27.9)        | 55 (23.6)        | 62 (26.6)         | 51 (21.9)        |            |         |                                     |                                                     |
|                            |       | OR (95% CI) <sup>a</sup> | 1.00             | 1.05 (0.62-1.78) | 1.21 (0.69-2.14)  | 1.39 (0.76-2.53) | 0.25       | 0.38    | 1.09 (1.01-1.17)                    |                                                     |
|                            | Men   | N cases (%)              | 69 (26.3)        | 66 (25.2)        | 64 (24.4)         | 63 (24.1)        |            |         |                                     |                                                     |
|                            |       | OR (95% CI) <sup>a</sup> | 1.00             | 0.75 (0.42-1.36) | 0.70 (0.38-1.29)  | 0.55 (0.31-0.97) | 0.04       | 0.11    | 0.95 (0.88-1.01)                    |                                                     |
| Primary conjugated BAs     |       |                          |                  |                  |                   |                  |            |         |                                     |                                                     |
| GCDCA (ng/mL)              |       |                          | <97.40           | 97.40 to <203.00 | 203.00 to <429.00 | ≥429.00          |            |         |                                     | 0.03                                                |
|                            | Women | N cases (%)              | 55 (23.6)        | 53 (22.8)        | 64 (27.5)         | 61 (26.2)        |            |         |                                     |                                                     |
|                            |       | OR (95% CI) <sup>a</sup> | 1.00             | 1.07 (0.59-1.94) | 1.56 (0.85-2.89)  | 2.04 (1.07-3.90) | 0.02       | 0.06    | 1.25 (1.08-1.46)                    |                                                     |
|                            | Men   | N cases (%)              | 57 (21.8)        | 57 (21.8)        | 71 (27.1)         | 77 (29.4)        |            |         |                                     |                                                     |
|                            |       | OR (95% CI) <sup>a</sup> | 1.00             | 0.80 (0.44-1.44) | 1.00 (0.57-1.76)  | 0.90 (0.51-1.58) | 0.90       | 0.95    | 1.02 (0.90-1.16)                    |                                                     |
| TCDC (ng/mL)               |       |                          | <9.63            | 9.63 to <25.30   | 25.30 to <60.30   | ≥60.30           |            |         |                                     | 0.16                                                |
|                            | Women | N cases (%)              | 38 (16.3)        | 60 (25.8)        | 57 (24.5)         | 78 (33.5)        |            |         |                                     |                                                     |
|                            |       | OR (95% CI) <sup>a</sup> | 1.00             | 2.08 (1.03-4.17) | 1.90 (0.94-3.83)  | 2.98 (1.42-6.24) | 0.01       | 0.047   | 1.17 (1.03-1.34)                    |                                                     |
|                            | Men   | N cases (%)              | 64 (24.4)        | 60 (22.9)        | 71 (27.1)         | 67 (25.6)        |            |         |                                     |                                                     |
|                            |       | OR (95% CI) <sup>a</sup> | 1.00             | 0.99 (0.57-1.73) | 0.99 (0.56-1.73)  | 0.99 (0.56-1.76) | 0.98       | 0.98    | 1.03 (0.94-1.14)                    |                                                     |
| GCA (ng/mL)                |       |                          | <27.50           | 27.50 to <58.20  | 58.20 to <132.00  | ≥132.00          |            |         |                                     | 0.16                                                |
|                            | Women | N cases (%)              | 57 (24.5)        | 40 (17.2)        | 65 (27.9)         | 71 (30.5)        |            |         |                                     |                                                     |
|                            |       | OR (95% CI) <sup>a</sup> | 1.00             | 0.96 (0.52-1.75) | 1.95 (1.05-3.60)  | 2.26 (1.21-4.22) | 0.003      | 0.022   | 1.17 (1.03-1.34)                    |                                                     |
|                            | Men   | N cases (%)              | 59 (22.5)        | 58 (22.1)        | 73 (27.9)         | 72 (27.5)        |            |         |                                     |                                                     |
|                            |       | OR (95% CI) <sup>a</sup> | 1.00             | 0.69 (0.39-1.23) | 0.87 (0.50-1.50)  | 0.94 (0.53-1.68) | 0.92       | 0.95    | 1.04 (0.93-1.17)                    |                                                     |
| TCA (ng/mL)                |       |                          | <1.85            | 1.85 to <6.39    | 6.39 to <17.40    | ≥17.40           |            |         |                                     | 0.54                                                |
|                            | Women | N cases (%)              | 38 (16.3)        | 58 (24.9)        | 45 (19.3)         | 92 (39.5)        |            |         |                                     |                                                     |
|                            |       | OR (95% CI) <sup>a</sup> | 1.00             | 1.30 (0.66-2.57) | 1.37 (0.69-2.72)  | 2.20 (1.14-4.26) | 0.01       | 0.053   | 1.08 (0.99-1.18)                    |                                                     |
|                            | Men   | N cases (%)              | 59 (22.5)        | 77 (29.4)        | 56 (21.4)         | 70 (26.7)        |            |         |                                     |                                                     |
|                            |       | OR (95% CI) <sup>a</sup> | 1.00             | 1.43 (0.85-2.40) | 0.91 (0.51-1.63)  | 1.51 (0.84-2.70) | 0.41       | 0.54    | 1.04 (0.97-1.12)                    |                                                     |
| Secondary unconjugated BAs |       |                          |                  |                  |                   |                  |            |         |                                     |                                                     |
| DCA (ng/mL)                |       |                          | <31.80           | 31.80 to <71.40  | 71.40 to <162.00  | ≥162.00          |            |         |                                     | 0.78                                                |
|                            | Women | N cases (%)              | 39 (16.7)        | 47 (20.2)        | 73 (31.3)         | 74 (31.8)        |            |         |                                     |                                                     |
|                            |       | OR (95% CI) <sup>a</sup> | 1.00             | 1.24 (0.67-2.28) | 1.93 (1.07-3.48)  | 2.85 (1.45-5.60) | 0.001      | 0.011   | 1.08 (1.00-1.18)                    |                                                     |
|                            | Men   | N cases (%)              | 57 (21.8)        | 50 (19.1)        | 80 (30.5)         | 75 (28.6)        |            |         |                                     |                                                     |
|                            |       | OR (95% CI) <sup>a</sup> | 1.00             | 1.06 (0.58-1.94) | 1.49 (0.83-2.66)  | 1.20 (0.68-2.10) | 0.36       | 0.50    | 1.04 (0.97-1.12)                    |                                                     |
| LCA (ng/mL)                | Women |                          | <0.63            | 0.63 to <2.52    | 2.52 to <5.78     | ≥5.78            |            |         |                                     | 0.89                                                |
|                            | Women | N cases (%)              | 47 (20.2)        | 49 (21.0)        | 71 (30.5)         | 66 (28.3)        |            |         |                                     |                                                     |
|                            |       | OR (95% CI) <sup>a</sup> | 1.00             | 1.02 (0.58-1.77) | 2.09 (1.14-3.83)  | 1.73 (0.93-3.21) | 0.04       | 0.11    | 1.03 (0.98-1.09)                    |                                                     |
|                            | Men   | N cases (%)              | 47 (17.9)        | 64 (24.4)        | 60 (22.9)         | 91 (34.7)        |            |         |                                     |                                                     |
|                            |       | OR (95% CI) <sup>a</sup> | 1.00             | 1.28 (0.72-2.26) | 1.21 (0.65-2.23)  | 1.81 (1.02-3.21) | 0.05       | 0.13    | 1.04 (0.98-1.09)                    |                                                     |
| Secondary conjugated BAs   |       |                          |                  |                  |                   |                  |            |         |                                     |                                                     |
| GDCA (ng/mL)               | Women |                          | <34.30           | 34.30 to <80.90  | 80.90 to <193.00  | ≥193.00          |            |         |                                     | 0.21                                                |
|                            |       | N cases (%)              | 42 (18.0)        | 47 (20.2)        | 57 (24.5)         | 87 (37.3)        |            |         |                                     |                                                     |
|                            |       | OR (95% CI) <sup>a</sup> | 1.00             | 1.48 (0.78-2.78) | 1.68 (0.86-3.28)  | 3.45 (1.79-6.64) | 0.0002     | 0.006   | 1.16 (1.04-1.29)                    |                                                     |
|                            | Men   | N cases (%)              | 51 (19.5)        | 73 (27.9)        | 68 (26.0)         | 70 (26.7)        |            |         |                                     |                                                     |
|                            |       | OR (95% CI) <sup>a</sup> | 1.00             | 1.03 (0.58-1.82) | 1.09 (0.62-1.92)  | 1.02 (0.57-1.83) | 0.91       | 0.95    | 1.06 (0.97-1.14)                    |                                                     |
| TDCA (ng/mL)               |       |                          | <2.88            | 2.88 to <10.10   | 10.10 to <27.90   | ≥27.90           |            |         |                                     | 0.92                                                |
|                            | Women | N cases (%)              | 38 (16.3)        | 40 (17.2)        | 58 (24.9)         | 97 (41.6)        |            |         |                                     |                                                     |
|                            |       | OR (95% CI) <sup>a</sup> | 1.00             | 1.06 (0.56-2.02) | 1.92 (0.97-3.79)  | 2.36 (1.22-4.55) | 0.004      | 0.023   | 1.08 (1.00-1.15)                    |                                                     |
|                            | Men   | N cases (%)              | 56 (21.4)        | 74 (28.2)        | 67 (25.6)         | 65 (24.8)        |            |         |                                     |                                                     |
|                            |       | OR (95% CI) <sup>a</sup> | 1.00             | 1.17 (0.69-1.97) | 0.97 (0.54-1.74)  | 1.46 (0.81-2.62) | 0.30       | 0.43    | 1.06 (1.00-1.13)                    |                                                     |
| GLCA (ng/mL)               |       |                          | <0.67            | 0.67 to <2.94    | 2.94 to <9.61     | ≥9.61            |            |         |                                     | 0.70                                                |
|                            | Women | N cases (%)              | 41 (17.6)        | 54 (23.2)        | 67 (28.8)         | 71 (30.5)        |            |         |                                     |                                                     |
|                            |       | OR (95% CI) <sup>a</sup> | 1.00             | 1.28 (0.69-2.38) | 2.02 (1.11-3.67)  | 2.71 (1.41-5.22) | 0.002      | 0.015   | 1.08 (1.02-1.15)                    |                                                     |
|                            | Men   | N cases (%)              | 43 (16.4)        | 72 (27.5)        | 71 (27.1)         | 76 (29.0)        |            |         |                                     |                                                     |
|                            |       | OR (95% CI) <sup>a</sup> | 1.00             | 1.40 (0.77-2.56) | 1.43 (0.81-2.53)  | 1.45 (0.83-2.53) | 0.23       | 0.36    | 1.05 (0.99-1.11)                    |                                                     |
| TLCA                       |       |                          | Not quantifiable | Quantifiable     |                   |                  |            |         |                                     | 0.60                                                |
|                            | Women | N cases (%)              | 86 (36.9)        | 147 (63.1)       |                   |                  |            |         | 1.07 (1.02-1.12)                    |                                                     |

|                           |       |                          |                  |                  |                  |                  |      |      |                  |                  |      |
|---------------------------|-------|--------------------------|------------------|------------------|------------------|------------------|------|------|------------------|------------------|------|
|                           |       | OR (95% CI) <sup>a</sup> | 1.00             | 1.84 (1.16-2.93) |                  |                  |      | 0.01 | 0.047            |                  |      |
|                           | Men   | N cases (%)              | 124 (47.3)       | 138 (52.7)       |                  |                  |      |      |                  | 1.03 (0.99-1.07) |      |
|                           |       | OR (95% CI) <sup>a</sup> | 1.00             | 1.40 (0.91-2.15) |                  |                  |      | 0.13 | 0.23             |                  |      |
| Tertiary unconjugated BAs |       |                          |                  |                  |                  |                  |      |      |                  |                  |      |
| UDCA (ng/mL)              |       |                          | <2.00            | 2.00 to <6.21    | 6.21 to <19.40   | ≥19.40           |      |      |                  |                  | 0.01 |
|                           | Women | N cases (%)              | 47 (20.2)        | 56 (24.0)        | 68 (29.2)        | 62 (26.6)        |      |      |                  |                  |      |
|                           |       | OR (95% CI) <sup>a</sup> | 1.00             | 1.41 (0.77-2.61) | 2.08 (1.21-3.87) | 1.63 (0.90-2.97) | 0.08 | 0.19 | 1.07 (1.01-1.12) |                  |      |
|                           | Men   | N cases (%)              | 63 (24.1)        | 58 (22.1)        | 76 (29.0)        | 65 (24.8)        |      |      |                  |                  |      |
|                           |       | OR (95% CI) <sup>a</sup> | 1.00             | 0.70 (0.39-1.25) | 0.83 (0.47-1.47) | 0.72 (0.40-1.30) | 0.45 | 0.56 | 0.94 (0.90-1.00) |                  |      |
| Tertiary conjugated BAs   |       |                          |                  |                  |                  |                  |      |      |                  |                  |      |
| GUDCA (ng/mL)             |       |                          | <9.35            | 9.35 to <21.80   | 21.80 to <57.40  | ≥57.40           |      |      |                  |                  | 0.03 |
|                           | Women | N cases (%)              | 56 (24.0)        | 50 (21.5)        | 68 (29.2)        | 59 (25.3)        |      |      |                  |                  |      |
|                           |       | OR (95% CI) <sup>a</sup> | 1.00             | 1.14 (0.66-1.97) | 1.51 (0.86-2.64) | 1.35 (0.75-2.44) | 0.19 | 0.32 | 1.11 (1.00-1.23) |                  |      |
|                           | Men   | N cases (%)              | 70 (26.7)        | 65 (24.8)        | 69 (26.3)        | 58 (22.1)        |      |      |                  |                  |      |
|                           |       | OR (95% CI) <sup>a</sup> | 1.00             | 0.62 (0.36-1.07) | 0.68 (0.39-1.20) | 0.56 (0.31-1.01) | 0.09 | 0.19 | 0.96 (0.87-1.07) |                  |      |
| TUDCA (ng/mL)             |       |                          | Not quantifiable | Quantifiable     |                  |                  |      |      |                  |                  | 0.50 |
|                           | Women | N cases (%)              | 84 (36.1)        | 149 (63.9)       |                  |                  | 0.85 | 0.95 | 1.01 (0.97-1.06) |                  |      |
|                           |       | OR (95% CI) <sup>a</sup> | 1.00             | 1.05 (0.66-1.66) |                  |                  |      |      |                  |                  |      |
|                           | Men   | N cases (%)              | 128 (48.9)       | 134 (51.2)       |                  |                  | 0.70 | 0.84 | 1.02 (0.98-1.06) |                  |      |
|                           |       | OR (95% CI) <sup>a</sup> | 1.00             | 1.08 (0.73-1.60) |                  |                  |      |      |                  |                  |      |

<sup>a</sup> Adjusted for age at baseline (years), BMI (kg/m<sup>2</sup>), smoking status (never, former, current), family history of CRC (no, yes), diabetes diagnosis (no, yes), alcohol drinker (no, yes), alcoholic intake (average number of drinks/day), hours spent in vigorous physical activity (none, <1 hour/wk, 1 hour/wk, 2 hours/wk, 3 hours/wk, ≥4 hours/wk), not processed red meat (g/day/1000 kcal), processed meat (g/day/1000 kcal), MPED equivalents of whole grains (oz/day/1000 kcal), total energy (kcal/day), education (high school graduate or less, some college or post high school training, college graduate or postgraduate), hormone replacement therapy status (women only; never, current, former)

<sup>b</sup> Controls were alive and cancer-free at case diagnosis date and were incidence-density sampled and matched on age at randomization (+/- 5 years), sex, race, year of randomization, and season of blood draw

<sup>c</sup> P-interaction between log<sub>2</sub>-transformed bile acid measure and sex estimated in unconditional logistic regression model including sex as a covariate in the model

Supplementary Table 2. Association of summary short chain fatty acid (SCFA) and bile acid (BA) measures with colorectal cancer in the PLCO Study (n=495 cases [n=233 women and n=262 men]; n=495 matched controls) and ATBC Study (n=598 cases; n=598 matched controls)

| Study              | Sex   |                          | Colorectal Cancer |                   |                   |                  |       |                  | P-trend | log <sub>2</sub> [BA] | P-interaction <sup>d</sup> |
|--------------------|-------|--------------------------|-------------------|-------------------|-------------------|------------------|-------|------------------|---------|-----------------------|----------------------------|
|                    |       |                          | Quartile 1 (ref)  | Quartile 2        | Quartile 3        | Quartile 4       |       |                  |         |                       |                            |
| Total BA           |       |                          |                   |                   |                   |                  |       |                  |         |                       |                            |
| PLCO               | Women | Definition               | <350.73           | 350.73 to <680.59 | 680.59 to 1353.49 | ≥1353.49         |       |                  |         | 0.05                  |                            |
|                    |       | N cases (%)              | 47 (20.2)         | 46 (19.7)         | 75 (32.2)         | 65 (27.9)        | --    | 233 (100)        | --      |                       |                            |
|                    |       | OR (95% CI) <sup>a</sup> | 1.00              | 1.07 (0.62-1.82)  | 1.85 (1.12-3.06)  | 1.78 (1.02-3.08) | 0.009 | 1.25 (1.09-1.44) | --      |                       |                            |
|                    | Men   | OR (95% CI) <sup>b</sup> | 1.00              | 1.06 (0.57-1.95)  | 1.80 (1.03-3.12)  | 1.95 (1.04-3.66) | 0.01  | 1.31 (1.11-1.53) | --      |                       |                            |
|                    |       | N cases (%)              | 48 (18.3)         | 77 (29.4)         | 63 (24.1)         | 74 (28.2)        | --    | 262 (100)        | --      |                       |                            |
|                    |       | OR (95% CI) <sup>a</sup> | 1.00              | 1.57 (0.93-2.65)  | 1.13 (0.68-1.88)  | 1.37 (0.78-2.40) | 0.64  | 1.05 (0.92-1.19) | --      |                       |                            |
| ATBC               | Men   | OR (95% CI) <sup>b</sup> | 1.00              | 1.34 (0.76-2.38)  | 0.92 (0.52-1.63)  | 1.26 (0.68-2.34) | 0.87  | 1.05 (0.91-1.21) | --      |                       |                            |
|                    |       | Definition               | <279.92           | 279.92 to <507.14 | 507.14 to <896.69 | ≥896.69          |       |                  |         | --                    |                            |
|                    |       | N cases (%)              | 123 (20.6)        | 154 (25.8)        | 137 (22.8)        | 184 (30.8)       | --    | 598 (100)        | --      |                       |                            |
| PLCO               | Women | OR (95% CI) <sup>a</sup> | 1.00              | 1.27 (0.91-1.76)  | 1.14 (0.82-1.59)  | 1.48 (1.08-2.03) | 0.03  | 1.11 (1.01-1.21) | --      |                       |                            |
|                    |       | OR (95% CI) <sup>b</sup> | 1.00              | 1.29 (0.92-1.81)  | 1.13 (0.80-1.60)  | 1.44 (1.04-2.00) | 0.06  | 1.10 (1.00-1.20) | --      |                       |                            |
|                    |       | Definition               | <181.70           | 181.70 to <400.99 | 400.99 to <836.01 | ≥836.01          |       |                  |         | 0.05                  |                            |
|                    | Men   | N cases (%)              | 46 (19.7)         | 61 (26.2)         | 60 (25.8)         | 66 (28.3)        | --    | 233 (100)        | --      |                       |                            |
|                    |       | OR (95% CI) <sup>a</sup> | 1.00              | 1.35 (0.81-2.27)  | 1.81 (1.04-3.17)  | 2.20 (1.25-3.85) | 0.004 | 1.19 (1.05-1.35) | --      |                       |                            |
|                    |       | OR (95% CI) <sup>b</sup> | 1.00              | 1.33 (0.73-2.42)  | 1.66 (0.88-3.14)  | 2.56 (1.37-4.79) | 0.003 | 1.22 (1.06-1.41) | --      |                       |                            |
| ATBC               | Men   | N cases (%)              | 48 (18.3)         | 74 (28.2)         | 63 (24.1)         | 77 (29.4)        | --    | 262 (100)        | --      |                       |                            |
|                    |       | OR (95% CI) <sup>a</sup> | 1.00              | 1.59 (0.94-2.70)  | 0.97 (0.57-1.64)  | 1.18 (0.70-1.99) | 0.93  | 1.00 (0.89-1.12) | --      |                       |                            |
|                    |       | OR (95% CI) <sup>b</sup> | 1.00              | 1.45 (0.81-2.59)  | 0.87 (0.49-1.58)  | 1.23 (0.68-2.22) | 0.86  | 1.01 (0.89-1.15) | --      |                       |                            |
| Total primary BA   |       |                          |                   |                   |                   |                  |       |                  |         |                       |                            |
| PLCO               | Women | Definition               | <159.47           | 159.47 to <315.88 | 315.88 to <622.97 | ≥622.97          |       |                  |         | --                    |                            |
|                    |       | N cases (%)              | 133 (22.2)        | 147 (24.6)        | 130 (21.7)        | 188 (31.4)       | --    | 598 (100)        | --      |                       |                            |
|                    |       | OR (95% CI) <sup>a</sup> | 1.00              | 1.12 (0.81-1.56)  | 0.98 (0.71-1.37)  | 1.42 (1.04-1.96) | 0.06  | 1.08 (1.00-1.17) | --      |                       |                            |
|                    | Men   | OR (95% CI) <sup>b</sup> | 1.00              | 1.12 (0.79-1.57)  | 0.96 (0.68-1.35)  | 1.37 (0.99-1.90) | 0.12  | 1.07 (0.99-1.16) | --      |                       |                            |
|                    |       | N cases (%)              | 42 (18.0)         | 47 (20.2)         | 64 (27.5)         | 80 (34.3)        | --    | 233 (100)        | --      |                       |                            |
|                    |       | OR (95% CI) <sup>a</sup> | 1.00              | 1.15 (0.63-2.07)  | 1.42 (0.82-2.44)  | 2.07 (1.18-3.61) | 0.006 | 1.10 (1.00-1.21) | --      |                       |                            |
| ATBC               | Men   | OR (95% CI) <sup>b</sup> | 1.00              | 1.35 (0.70-2.61)  | 1.73 (0.95-3.18)  | 2.60 (1.35-4.99) | 0.003 | 1.14 (1.02-1.27) | --      |                       |                            |
|                    |       | N cases (%)              | 49 (18.7)         | 65 (24.8)         | 75 (28.6)         | 73 (27.9)        | --    | 262 (100)        | --      |                       |                            |
|                    |       | OR (95% CI) <sup>a</sup> | 1.00              | 1.38 (0.82-2.34)  | 1.65 (1.00-2.71)  | 1.48 (0.86-2.53) | 0.11  | 1.08 (0.99-1.18) | --      |                       |                            |
| Total secondary BA |       |                          |                   |                   |                   |                  |       |                  |         |                       |                            |
| PLCO               | Women | Definition               | <59.76            | 59.76 to <125.06  | 125.06 to <218.11 | ≥218.11          |       |                  |         | --                    |                            |
|                    |       | N cases (%)              | 125 (20.9)        | 145 (24.3)        | 141 (23.6)        | 187 (31.3)       | --    | 598 (100)        | --      |                       |                            |
|                    |       | OR (95% CI) <sup>a</sup> | 1.00              | 1.17 (0.83-1.64)  | 1.15 (0.82-1.62)  | 1.50 (1.09-2.08) | 0.02  | 1.10 (1.02-1.20) | --      |                       |                            |
|                    | Men   | OR (95% CI) <sup>b</sup> | 1.00              | 1.11 (0.78-1.58)  | 1.15 (0.81-1.63)  | 1.47 (1.04-2.07) | 0.03  | 1.09 (1.00-1.19) | --      |                       |                            |
|                    |       | N cases (%)              | 42 (18.0)         | 47 (20.2)         | 64 (27.5)         | 80 (34.3)        | --    | 233 (100)        | --      |                       |                            |
|                    |       | OR (95% CI) <sup>a</sup> | 1.00              | 1.15 (0.63-2.07)  | 1.42 (0.82-2.44)  | 2.07 (1.18-3.61) | 0.006 | 1.10 (1.00-1.21) | --      |                       |                            |
| ATBC               | Men   | OR (95% CI) <sup>b</sup> | 1.00              | 1.35 (0.70-2.61)  | 1.73 (0.95-3.18)  | 2.60 (1.35-4.99) | 0.003 | 1.14 (1.02-1.27) | --      |                       |                            |
|                    |       | N cases (%)              | 49 (18.7)         | 65 (24.8)         | 75 (28.6)         | 73 (27.9)        | --    | 262 (100)        | --      |                       |                            |
|                    |       | OR (95% CI) <sup>a</sup> | 1.00              | 1.38 (0.82-2.34)  | 1.65 (1.00-2.71)  | 1.48 (0.86-2.53) | 0.11  | 1.08 (0.99-1.18) | --      |                       |                            |
| Total SCFA         |       |                          |                   |                   |                   |                  |       |                  |         |                       |                            |
| PLCO               | Women | Definition               | <1023.4           | 1023.4 to <1513.5 | 1513.5 to <2319.4 | ≥2319.4          |       |                  |         | 0.03                  |                            |
|                    |       | N cases (%)              | 70 (20.0)         | 59 (25.3)         | 52 (22.3)         | 52 (22.3)        | --    | 233 (100)        | --      |                       |                            |
|                    |       | OR (95% CI) <sup>a</sup> | 1.00              | 0.91 (0.55-1.51)  | 0.72 (0.44-1.19)  | 0.67 (0.40-1.11) | 0.09  | 0.84 (0.68-1.04) | --      |                       |                            |
|                    | Men   | OR (95% CI) <sup>b</sup> | 1.00              | 0.78 (0.44-1.38)  | 0.61 (0.34-1.07)  | 0.55 (0.31-0.98) | 0.03  | 0.77 (0.61-0.98) | --      |                       |                            |
|                    |       | N cases (%)              | 62 (23.7)         | 54 (20.6)         | 77 (29.4)         | 69 (26.3)        | --    | 262 (100)        | --      |                       |                            |
|                    |       | OR (95% CI) <sup>a</sup> | 1.00              | 0.84 (0.52-1.36)  | 1.32 (0.81-2.16)  | 1.25 (0.76-2.06) | 0.19  | 1.12 (0.93-1.35) | --      |                       |                            |
| ATBC               | Men   | OR (95% CI) <sup>b</sup> | 1.00              | 0.69 (0.40-1.20)  | 1.22 (0.70-2.11)  | 1.32 (0.75-2.33) | 0.15  | 1.20 (0.97-1.48) | --      |                       |                            |
|                    |       | N cases (%)              | 166 (27.8)        | 146 (24.4)        | 135 (22.6)        | 151 (25.3)       | --    | 598 (100)        | --      |                       |                            |
|                    |       | OR (95% CI) <sup>a</sup> | 1.00              | 0.88 (0.64-1.20)  | 0.82 (0.60-1.13)  | 0.91 (0.67-1.24) | 0.47  | 0.98 (0.88-1.09) | --      |                       |                            |
| ATBC               | Men   | OR (95% CI) <sup>b</sup> | 1.00              | 0.94 (0.68-1.30)  | 0.85 (0.61-1.18)  | 0.92 (0.65-1.28) | 0.48  | 0.98 (0.87-1.09) | --      |                       |                            |

<sup>a</sup> Unadjusted models, conditioned on matching factors only

<sup>b</sup> Adjusted for age at baseline (years), BMI (kg/m<sup>2</sup>), smoking status (never, former, current), family history of CRC (no, yes), diabetes diagnosis (no, yes), alcohol drinker (no, yes), alcoholic intake (average number of drinks/day), hours spent in vigorous physical activity (none, <1 hour/wk, 1 hour/wk, 2 hours/wk, 3 hours/wk, ≥4 hours/wk), not processed red meat (g/day/1000 kcal), processed meat (g/day/1000 kcal), MPED equivalents of whole grains (oz/day/1000 kcal), total energy (kcal/day), education (high school graduate or less, some college or post high school training, college graduate or postgraduate), hormone replacement therapy status (women only; never, current, former)

<sup>c</sup> Adjusted for age at baseline (years), BMI (kg/m<sup>2</sup>), smoking intensity (cigarettes/day), diabetes diagnosis (no, yes), average number of alcoholic drinks per day, frequency of physical activity in leisure time (none, <1/wk, 1-2/wk, ≥3/wk), total red meat (g/day/1000 kcal), total processed meat (g/day/1000 kcal), whole grains (oz/day/100kcal), total energy (kcal/day), education (less than elementary school, some junior high school, completed junior high school, some senior high school, senior high school graduate)

<sup>d</sup> P-interaction between log<sub>2</sub>-transformed bile acid measure and sex estimated in unconditional logistic regression model including sex as a covariate in the model

Supplementary Table 3. Association of bile acids (BAs) with colorectal cancer (n=598 cases; n=598 matched controls<sup>b</sup>) in the ATBC Study

|                            |                          | BA Quartile      |                  |                  |                  | Trend Test |         | Continuous            |
|----------------------------|--------------------------|------------------|------------------|------------------|------------------|------------|---------|-----------------------|
|                            |                          | 1 (Ref)          | 2                | 3                | 4                | P-value    | Q-value | log <sub>2</sub> [BA] |
| Primary unconjugated BAs   |                          |                  |                  |                  |                  |            |         |                       |
| CDCA (ng/mL)               |                          | <17.0            | 17.0 to <42.8    | 42.8 to <131.0   | ≥131.0           |            |         |                       |
|                            | N cases (%)              | 170 (28.4)       | 127 (21.2)       | 146 (24.4)       | 155 (25.9)       |            |         |                       |
|                            | OR (95% CI) <sup>a</sup> | 1.00             | 0.79 (0.57-1.09) | 0.88 (0.63-1.23) | 0.92 (0.66-1.28) | 0.74       | 0.93    | 1.00 (0.94-1.05)      |
| CA (ng/mL)                 |                          | <10.2            | 10.2 to <25.1    | 25.1 to <96.9    | ≥96.9            |            |         |                       |
|                            | N cases (%)              | 152 (25.4)       | 156 (26.1)       | 139 (23.2)       | 151 (25.3)       |            |         |                       |
|                            | OR (95% CI) <sup>a</sup> | 1.00             | 1.03 (0.75-1.43) | 0.93 (0.67-1.30) | 0.99 (0.72-1.38) | 0.83       | 0.96    | 1.00 (0.95-1.06)      |
| Primary conjugated BAs     |                          |                  |                  |                  |                  |            |         |                       |
| GCDCA (ng/mL)              |                          | <62.4            | 62.4 to <126.0   | 126.0 to <251.0  | ≥251.0           |            |         |                       |
|                            | N cases (%)              | 120 (20.1)       | 140 (23.4)       | 168 (28.1)       | 170 (28.4)       |            |         |                       |
|                            | OR (95% CI) <sup>a</sup> | 1.00             | 1.11 (0.79-1.57) | 1.38 (0.98-1.92) | 1.33 (0.94-1.87) | 0.05       | 0.27    | 1.10 (1.02-1.20)      |
| TCDCA (ng/mL)              |                          | <7.9             | 7.9 to <14.6     | 14.6 to <31.4    | ≥31.4            |            |         |                       |
|                            | N cases (%)              | 128 (21.4)       | 136 (22.7)       | 164 (27.4)       | 170 (28.4)       |            |         |                       |
|                            | OR (95% CI) <sup>a</sup> | 1.00             | 1.03 (0.73-1.46) | 1.21 (0.86-1.72) | 1.24 (0.89-1.74) | 0.14       | 0.45    | 1.06 (0.98-1.15)      |
| GCA (ng/mL)                |                          | <14.1            | 14.1 to <29.7    | 29.7 to <53.5    | ≥53.5            |            |         |                       |
|                            | N cases (%)              | 113 (18.9)       | 171 (28.6)       | 113 (18.9)       | 201 (33.6)       |            |         |                       |
|                            | OR (95% CI) <sup>a</sup> | 1.00             | 1.62 (1.14-2.31) | 0.98 (0.68-1.41) | 1.82 (1.27-2.60) | 0.02       | 0.15    | 1.11 (1.02-1.21)      |
| TCA (ng/mL)                |                          | ≤1.25            | >1.25 to <4.3    | 4.3 to <8.8      | ≥8.8             |            |         |                       |
|                            | N cases (%)              | 161 (26.9)       | 125 (20.9)       | 134 (22.4)       | 178 (29.8)       |            |         |                       |
|                            | OR (95% CI) <sup>a</sup> | 1.00             | 1.10 (0.78-1.56) | 0.92 (0.66-1.29) | 1.18 (0.85-1.62) | 0.50       | 0.75    | 1.06 (0.98-1.14)      |
| Secondary unconjugated BAs |                          |                  |                  |                  |                  |            |         |                       |
| DCA (ng/mL)                |                          | <31.5            | 31.5 to <70.5    | 70.5 to <138.0   | ≥138.0           |            |         |                       |
|                            | N cases (%)              | 141 (23.6)       | 134 (22.4)       | 151 (25.3)       | 172 (28.8)       |            |         |                       |
|                            | OR (95% CI) <sup>a</sup> | 1.00             | 0.88 (0.61-1.25) | 1.06 (0.75-1.50) | 1.18 (0.84-1.65) | 0.20       | 0.45    | 1.04 (0.97-1.11)      |
| LCA                        |                          | Not quantifiable | Quantifiable     |                  |                  |            |         |                       |
|                            | N cases (%)              | 333 (55.7)       | 265 (44.3)       |                  |                  |            |         |                       |
|                            | OR (95% CI) <sup>a</sup> | 1.00             | 1.00 (0.78-1.28) |                  |                  | 0.99       | 0.99    | 1.05 (0.93-1.17)      |
| Secondary conjugated BAs   |                          |                  |                  |                  |                  |            |         |                       |
| GDCA (ng/mL)               |                          | <13.4            | 13.4 to <28.0    | 28.0 to <65.5    | ≥65.5            |            |         |                       |
|                            | N cases (%)              | 111 (18.6)       | 124 (20.7)       | 196 (32.8)       | 167 (27.9)       |            |         |                       |
|                            | OR (95% CI) <sup>a</sup> | 1.00             | 1.10 (0.78-1.58) | 1.79 (1.26-2.55) | 1.54 (1.07-2.21) | 0.004      | 0.060   | 1.10 (1.02-1.18)      |
| TDCA (ng/mL)               |                          | Not quantifiable | Quantifiable     |                  |                  |            |         |                       |
|                            | N cases (%)              | 297 (49.7)       | 301 (50.3)       |                  |                  |            |         |                       |
|                            | OR (95% CI) <sup>a</sup> | 1.00             | 1.13 (0.89-1.43) |                  |                  | 0.33       | 0.55    | 1.08 (0.99-1.17)      |
| GLCA                       |                          | Not quantifiable | Quantifiable     |                  |                  |            |         |                       |
|                            | N cases (%)              | 312 (52.2)       | 286 (47.8)       |                  |                  |            |         |                       |
|                            | OR (95% CI) <sup>a</sup> | 1.00             | 1.19 (0.94-1.50) |                  |                  | 0.16       | 0.45    | 1.06 (0.97-1.16)      |
| TLCA                       |                          | Not quantifiable | Quantifiable     |                  |                  |            |         |                       |
|                            | N cases (%)              | 559 (93.5)       | 39 (6.5)         |                  |                  |            |         |                       |
|                            | OR (95% CI) <sup>a</sup> | 1.00             | 1.39 (0.83-2.32) |                  |                  | 0.21       | 0.45    | 1.16 (0.86-1.58)      |
| Tertiary unconjugated BAs  |                          |                  |                  |                  |                  |            |         |                       |
| UDCA (ng/mL)               |                          | ≤2.52            | >2.52 to 9.4     | 9.4 to 24.4      | ≥24.4            |            |         |                       |
|                            | N cases (%)              | 230 (38.5)       | 93 (15.6)        | 121 (20.2)       | 154 (25.8)       |            |         |                       |
|                            | OR (95% CI) <sup>a</sup> | 1.00             | 0.91 (0.63-1.30) | 0.74 (0.54-1.02) | 0.91 (0.67-1.24) | 0.28       | 0.53    | 0.98 (0.91-1.04)      |
| Tertiary conjugated BAs    |                          |                  |                  |                  |                  |            |         |                       |
| GUDCA (ng/mL)              |                          | <8.5             | 8.5 to <19.9     | 19.9 to <49.3    | ≥49.3            |            |         |                       |
|                            | N cases (%)              | 129 (21.6)       | 164 (27.4)       | 174 (29.1)       | 131 (21.9)       |            |         |                       |
|                            | OR (95% CI) <sup>a</sup> | 1.00             | 1.32 (0.95-1.85) | 1.28 (0.92-1.79) | 1.01 (0.72-1.42) | 0.97       | 0.99    | 1.02 (0.95-1.10)      |
| TUDCA                      |                          | Not quantifiable | Quantifiable     |                  |                  |            |         |                       |
|                            | N cases (%)              | 525 (87.8)       | 73 (12.2)        |                  |                  |            |         |                       |
|                            | OR (95% CI) <sup>a</sup> | 1                | 0.92 (0.65-1.31) |                  |                  | 0.65       | 0.89    | 0.96 (0.80-1.15)      |

<sup>a</sup> Adjusted for age at baseline (years), BMI (kg/m<sup>2</sup>), smoking intensity (cigarettes/day), diabetes diagnosis (no, yes), average number of alcoholic drinks per day, frequency of physical activity in leisure time (none, <1/wk, 1-2/wk, ≥3/wk), total red meat (g/day/1000 kcal), total processed meat (g/day/1000 kcal), whole grains (oz/day/100kcal), total energy (kcal/day), education (less than elementary school, some junior high school, completed junior high school, some senior high school, senior high school graduate)

<sup>b</sup> Controls were alive and cancer-free at case diagnosis date and were incidence-density sampled and matched on age at randomization (+/- 5 years), baseline serum draw date (+/- 30 days), fasting status (<8 vs. ≥8 hours)

Supplementary Table 4. Association of summary short chain fatty acid (SCFA) and bile acid (BA) measures with colorectal cancer (n=430 cases [n=198 women and n=232 men]; n=430 matched controls<sup>b</sup>) excluding cases occurring within 5 years of blood draw and their matched controls in the PLCO Study

| Summary BA measures |       | Definition               | Colorectal Cancer |                   |                   |                  |         |                       |                            |
|---------------------|-------|--------------------------|-------------------|-------------------|-------------------|------------------|---------|-----------------------|----------------------------|
|                     |       |                          | Quartile 1 (ref)  | Quartile 2        | Quartile 3        | Quartile 4       | P-trend | log <sub>2</sub> [BA] | P-interaction <sup>b</sup> |
| Total SCFA          |       |                          | <1023.4           | 1023.4 to <1513.5 | 1513.5 to <2319.4 | ≥2319.4          |         |                       | 0.10                       |
|                     | Women | N cases (%)              | 55 (27.8)         | 53 (26.8)         | 45 (22.7)         | 45 (22.7)        | --      | 198 (100)             | --                         |
|                     |       | OR (95% CI) <sup>a</sup> | 1.00              | 0.86 (0.47-1.59)  | 0.69 (0.37-1.27)  | 0.57 (0.30-1.27) | 0.07    | 0.80 (0.62-1.04)      | --                         |
|                     | Men   | N cases (%)              | 56 (24.1)         | 51 (22.0)         | 67 (28.9)         | 58 (25.0)        | --      | 232 (100)             | --                         |
|                     |       | OR (95% CI) <sup>a</sup> | 1.00              | 0.70 (0.39-1.22)  | 1.06 (0.59-1.90)  | 1.20 (0.65-2.21) | 0.36    | 1.15 (0.92-1.43)      | --                         |
| Total BA            |       |                          | <350.73           | 350.73 to <680.59 | 680.59 to 1353.49 | ≥1353.49         |         |                       | 0.01                       |
|                     | Women | N cases (%)              | 37 (18.7)         | 40 (20.2)         | 64 (32.3)         | 57 (28.8)        | --      | 198 (100)             | --                         |
|                     |       | OR (95% CI) <sup>a</sup> | 1.00              | 1.09 (0.56-2.14)  | 1.92 (1.05-3.52)  | 2.31 (1.16-4.60) | 0.005   | 1.38 (1.15-1.66)      | --                         |
|                     | Men   | N cases (%)              | 46 (19.8)         | 70 (30.2)         | 55 (23.7)         | 61 (26.3)        | --      | 263 (100)             | --                         |
|                     |       | OR (95% CI) <sup>a</sup> | 1.00              | 1.33 (0.72-2.46)  | 0.76 (0.41-1.40)  | 0.98 (0.50-1.93) | 0.45    | 0.99 (0.85-1.16)      | --                         |
| Total primary BA    |       |                          | <181.70           | 181.70 to <400.99 | 400.99 to <836.01 | ≥836.01          |         |                       | 0.01                       |
|                     | Women | N cases (%)              | 37 (18.7)         | 50 (25.3)         | 54 (27.3)         | 57 (28.8)        | --      | 198 (100)             | --                         |
|                     |       | OR (95% CI) <sup>a</sup> | 1.00              | 1.19 (0.62-2.28)  | 1.91 (0.95-3.83)  | 2.94 (1.47-5.87) | 0.001   | 1.28 (1.09-1.50)      | --                         |
|                     | Men   | N cases (%)              | 46 (19.8)         | 67 (28.9)         | 56 (24.1)         | 63 (27.2)        | --      | 232 (100)             | --                         |
|                     |       | OR (95% CI) <sup>a</sup> | 1.00              | 1.38 (0.74-2.56)  | 0.76 (0.40-1.46)  | 0.99 (0.52-1.86) | 0.64    | 0.95 (0.83-1.10)      | --                         |
| Total secondary BA  |       |                          | <93.11            | 93.11 to <195.43  | 195.43 to 418.45  | ≥418.45          |         |                       | 0.45                       |
|                     | Women | N cases (%)              | 34 (17.2)         | 38 (19.2)         | 58 (29.3)         | 68 (34.3)        | --      | 198 (100)             | --                         |
|                     |       | OR (95% CI) <sup>a</sup> | 1.00              | 1.22 (0.58-2.56)  | 2.05 (1.05-3.99)  | 2.92 (1.41-6.06) | 0.001   | 1.15 (1.03-1.30)      | --                         |
|                     | Men   | N cases (%)              | 43 (18.5)         | 62 (26.7)         | 67 (28.9)         | 60 (25.9)        | --      | 232 (100)             | --                         |
|                     |       | OR (95% CI) <sup>a</sup> | 1.00              | 1.60 (0.86-2.95)  | 1.35 (0.75-2.45)  | 1.20 (0.63-2.29) | 0.74    | 1.07 (0.96-1.19)      | --                         |

<sup>a</sup> Adjusted for age at baseline (years), BMI (kg/m<sup>2</sup>), smoking status (never, former, current), family history of CRC (no, yes), diabetes diagnosis (no, yes), alcohol drinker (no, yes), alcoholic intake (average number of drinks/day), hours spent in vigorous physical activity (none, <1 hour/wk, 1 hour/wk, 2 hours/wk, 3 hours/wk, ≥4 hours/wk), not processed red meat (g/day/1000 kcal), processed meat (g/day/1000 kcal), MPED equivalents of whole grains (oz/day/1000 kcal), total energy (kcal/day), education (high school graduate or less, some college or post high school training, college graduate or postgraduate), hormone replacement therapy status (women only; never, current, former)

<sup>b</sup> P-interaction between log<sub>2</sub>-transformed bile acid measure and sex estimated in unconditional logistic regression model including sex as a covariate in the model

Supplementary Table 5. Association of summary short chain fatty acid (SCFA) and bile acid (BA) measures with colorectal cancer (n=550 cases; n=550 matched controls<sup>b</sup>) excluding cases occurring within 5 years of blood draw and their match controls in the ATBC Study

| Summary BA measures |             | Quartile 1 (ref) | Quartile 2        | Quartile 3        | Quartile 4       | P-trend | log <sub>2</sub> [BA] |
|---------------------|-------------|------------------|-------------------|-------------------|------------------|---------|-----------------------|
| Total SCFA          | Definition  | <1412.8          | 1412.8 to <2073.4 | 2073.4 to <3078.2 | ≥3078.2          |         |                       |
|                     | N cases (%) | 150 (27.3)       | 131 (23.8)        | 129 (23.5)        | 140 (25.5)       |         | 550 (100)             |
|                     | OR (95% CI) | 1.00             | 0.94 (0.67-1.32)  | 0.94 (0.67-1.32)  | 0.97 (0.68-1.38) | 0.87    | 1.01 (0.89-1.13)      |
| Total BA            | Definition  | <279.92          | 279.92 to <507.14 | 507.14 to <896.69 | ≥896.69          |         |                       |
|                     | N cases (%) | 116 (21.1)       | 140 (25.5)        | 125 (22.7)        | 169 (30.7)       | --      | 550 (100)             |
|                     | OR (95% CI) | 1.00             | 1.29 (0.90-1.84)  | 1.13 (0.79-1.61)  | 1.46 (1.04-2.05) | 0.06    | 1.09 (0.99-1.20)      |
| Total primary BA    | Definition  | <159.47          | 159.47 to <315.88 | 315.88 to <622.97 | ≥622.97          |         |                       |
|                     | N cases (%) | 125 (22.7)       | 135 (24.6)        | 119 (21.6)        | 171 (31.1)       | --      | 550 (100)             |
|                     | OR (95% CI) | 1.00             | 1.16 (0.82-1.67)  | 0.97 (0.68-1.38)  | 1.38 (0.98-1.94) | 0.13    | 1.07 (0.99-1.17)      |
| Total secondary BA  | Definition  | <59.76           | 59.76 to <125.06  | 125.06 to <218.11 | ≥218.11          |         |                       |
|                     | N cases (%) | 116 (21.1)       | 134 (24.4)        | 131 (23.8)        | 169 (30.7)       | --      | 550 (100)             |
|                     | OR (95% CI) | 1.00             | 1.08 (0.75-1.55)  | 1.14 (0.79-1.64)  | 1.50 (1.05-2.14) | 0.02    | 1.08 (1.00-1.20)      |

<sup>a</sup> Adjusted for age at baseline (years), BMI (kg/m<sup>2</sup>), smoking intensity (cigarettes/day), diabetes diagnosis (no, yes), average number of alcoholic drinks per day, frequency of physical activity in leisure time (none, <1/wk, 1-2/wk, ≥3/wk), total red meat (g/day/1000 kcal), total processed meat (g/day/1000 kcal), whole grains (oz/day/100kcal), total energy (kcal/day), education (less than elementary school, some junior high school, completed junior high school, some senior high school, senior high school graduate)

<sup>b</sup> Controls were alive and cancer-free at case diagnosis date and were incidence-density sampled and matched on age at randomization (+/- 5 years), baseline serum draw date (+/- 30 days), fasting status (<8 vs. ≥8 hours)

Supplementary Table 6. Association of short chain acids (SCFAs) with colorectal cancer in the PLCO Study (n=495 cases [n=233 women and n=262 men]; n=495 matched controls)<sup>a</sup> by sex and the in the ATBC Study (n=598 cases; n=598 matched controls)<sup>b</sup>

| Study                   | Sex   |                          | SCFA Quartile |                   |                   |                  | Trend Test |         | Continuous              | Interaction Test for Sex |
|-------------------------|-------|--------------------------|---------------|-------------------|-------------------|------------------|------------|---------|-------------------------|--------------------------|
|                         |       |                          | 1 (Ref)       | 2                 | 3                 | 4                | P-value    | Q-value | log <sub>2</sub> [SCFA] | P-value <sup>c</sup>     |
| Acetic Acid (ng/mL)     |       |                          |               |                   |                   |                  |            |         |                         |                          |
| PLCO                    |       | Definition               | <782.0        | 782.0 to <1290.0  | 1290.0 to <2040.0 | ≥2040.0          |            |         |                         | 0.02                     |
|                         | Women | N cases (%)              | 71 (30.5)     | 66 (28.3)         | 43 (18.5)         | 53 (22.8)        |            |         |                         |                          |
|                         |       | OR (95% CI) <sup>d</sup> | 1.00          | 1.07 (0.61-1.90)  | 0.58 (0.33-1.04)  | 0.57 (0.32-1.03) | 0.02       | 0.20    | 0.78 (0.63-0.96)        |                          |
|                         | Men   | N cases (%)              | 57 (21.8)     | 72 (27.5)         | 63 (24.1)         | 70 (26.7)        |            |         |                         |                          |
|                         |       | OR (95% CI) <sup>d</sup> | 1.00          | 0.90 (0.52-1.55)  | 0.81 (0.46-1.44)  | 1.33 (0.75-2.37) | 0.35       | 0.70    | 1.16 (0.96-1.40)        |                          |
| ATBC                    |       | Definition               | <1060.0       | 1060.0 to <1690.0 | 1690.0 to <2670.0 | ≥2670.0          |            |         |                         |                          |
|                         | Men   | N cases (%)              | 167 (27.9)    | 140 (23.4)        | 138 (23.1)        | 153 (25.6)       |            |         |                         |                          |
|                         |       | OR (95% CI) <sup>e</sup> | 1.00          | 0.87 (0.63-1.20)  | 0.85 (0.61-1.17)  | 0.90 (0.61-1.17) | 0.52       | 0.93    | 0.98 (0.88-1.08)        |                          |
|                         |       |                          |               |                   |                   |                  |            |         |                         |                          |
| Butyric Acid (ng/mL)    |       |                          |               |                   |                   |                  |            |         |                         |                          |
| PLCO                    |       | Definition               | <17.3         | 17.3 to <24.7     | 24.7 to <34.6     | ≥34.6            |            |         |                         | 0.51                     |
|                         | Women | N cases (%)              | 50 (21.5)     | 54 (23.2)         | 48 (20.6)         | 81 (34.8)        |            |         |                         |                          |
|                         |       | OR (95% CI) <sup>d</sup> | 1.00          | 1.39 (0.75-2.58)  | 1.09 (0.57-2.07)  | 1.74 (0.90-3.38) | 0.17       | 0.60    | 1.37 (1.04-1.80)        |                          |
|                         | Men   | N cases (%)              | 69 (26.3)     | 68 (26.0)         | 48 (18.3)         | 77 (29.4)        |            |         |                         |                          |
|                         |       | OR (95% CI) <sup>d</sup> | 1.00          | 0.68 (0.39-1.18)  | 0.53 (0.29-0.95)  | 1.00 (0.58-1.72) | 0.91       | 0.91    | 1.13 (0.91-1.40)        |                          |
| ATBC                    |       | Definition               | <27.0         | 27.0 to <33.6     | 33.6 to <44.3     | ≥44.3            |            |         |                         |                          |
|                         | Men   | N cases (%)              | 149 (24.9)    | 152 (25.4)        | 137 (22.9)        | 160 (26.8)       |            |         |                         |                          |
|                         |       | OR (95% CI) <sup>e</sup> | 1.00          | 1.04 (0.75-1.43)  | 0.93 (0.67-1.30)  | 1.07 (0.77-1.50) | 0.85       | 0.93    | 0.98 (0.79-1.21)        |                          |
|                         |       |                          |               |                   |                   |                  |            |         |                         |                          |
| Propionic acid (ng/mL)  |       |                          |               |                   |                   |                  |            |         |                         |                          |
| PLCO                    |       | Definition               | <15.7         | 15.7 to <32.6     | 32.6 to <54.0     | ≥54.0            |            |         |                         | 0.76                     |
|                         | Women | N cases (%)              | 57 (24.5)     | 52 (22.3)         | 51 (21.9)         | 73 (31.3)        |            |         |                         |                          |
|                         |       | OR (95% CI) <sup>d</sup> | 1.00          | 0.92 (0.51-1.67)  | 0.82 (0.44-1.53)  | 1.60 (0.81-3.18) | 0.23       | 0.60    | 1.01 (0.93-1.11)        |                          |
|                         | Men   | N cases (%)              | 69 (26.3)     | 63 (24.1)         | 46 (17.6)         | 84 (32.1)        |            |         |                         |                          |
|                         |       | OR (95% CI) <sup>d</sup> | 1.00          | 0.70 (0.40-1.24)  | 0.70 (0.38-1.30)  | 1.11 (0.61-2.03) | 0.55       | 0.73    | 1.04 (0.96-1.14)        |                          |
| ATBC                    |       | Definition               | <51.7         | 51.7 to <70.2     | 70.2 to <93.4     | ≥93.4            |            |         |                         |                          |
|                         | Men   | N cases (%)              | 148 (24.8)    | 135 (22.6)        | 174 (29.1)        | 141 (22.6)       |            |         |                         |                          |
|                         |       | OR (95% CI) <sup>e</sup> | 1.00          | 0.94 (0.64-1.39)  | 1.23 (0.84-1.80)  | 0.93 (0.62-1.38) | 0.92       | 0.93    | 1.04 (0.88-1.23)        |                          |
|                         |       |                          |               |                   |                   |                  |            |         |                         |                          |
| Hexanoic acid (ng/mL)   |       |                          |               |                   |                   |                  |            |         |                         |                          |
| PLCO                    |       | Definition               | <30.1         | 30.1 to <39.6     | 39.6 to <53.6     | ≥53.6            |            |         |                         | 0.73                     |
|                         | Women | N cases (%)              | 51 (21.9)     | 55 (23.6)         | 68 (29.2)         | 59 (25.3)        |            |         |                         |                          |
|                         |       | OR (95% CI) <sup>a</sup> | 1.00          | 0.67 (0.36-1.26)  | 0.82 (0.42-1.62)  | 0.59 (0.30-1.18) | 0.25       | 0.60    | 0.92 (0.63-1.36)        |                          |
|                         | Men   | N cases (%)              | 75 (28.6)     | 65 (24.8)         | 57 (21.8)         | 65 (24.8)        |            |         |                         |                          |
|                         |       | OR (95% CI) <sup>a</sup> | 1.00          | 1.10 (0.65-1.89)  | 0.85 (0.47-1.54)  | 1.29 (0.67-2.48) | 0.69       | 0.75    | 1.10 (0.75-1.61)        |                          |
| ATBC                    |       | Definition               | <70.7         | 70.7 to <79.8     | 79.8 to <93.1     | ≥93.1            |            |         |                         |                          |
|                         | Men   | N cases (%)              | 140 (23.4)    | 133 (22.2)        | 169 (28.3)        | 156 (26.1)       |            |         |                         |                          |
|                         |       | OR (95% CI) <sup>b</sup> | 1.00          | 0.96 (0.69-1.35)  | 1.14 (0.83-1.58)  | 1.10 (0.78-1.54) | 0.40       | 0.93    | 1.22 (0.86-1.75)        |                          |
|                         |       |                          |               |                   |                   |                  |            |         |                         |                          |
| Isobutyric acid (ng/mL) |       |                          |               |                   |                   |                  |            |         |                         |                          |
| PLCO                    |       | Definition               | <42.4         | 42.4 to <56.0     | 56.0 to <73.6     | ≥73.6            |            |         |                         | 0.87                     |
|                         | Women | N cases (%)              | 67 (28.8)     | 61 (26.2)         | 46 (19.7)         | 59 (25.3)        |            |         |                         |                          |
|                         |       | OR (95% CI) <sup>d</sup> | 1.00          | 0.73 (0.41-1.32)  | 0.53 (0.26-1.07)  | 0.81 (0.41-1.58) | 0.55       | 0.73    | 1.07 (0.83-1.37)        |                          |
|                         | Men   | N cases (%)              | 71 (27.1)     | 52 (19.9)         | 62 (23.7)         | 77 (29.4)        |            |         |                         |                          |
|                         |       | OR (95% CI) <sup>d</sup> | 1.00          | 0.68 (0.39-1.20)  | 0.79 (0.44-1.44)  | 0.87 (0.45-1.70) | 0.69       | 0.75    | 1.00 (0.75-1.33)        |                          |
| ATBC                    |       | Definition               | <78.9         | 78.9 to <92.6     | 92.6 to <109.0    | ≥109.0           |            |         |                         |                          |
|                         | Men   | N cases (%)              | 165 (27.6)    | 121 (20.2)        | 145 (24.3)        | 167 (27.9)       |            |         |                         |                          |
|                         |       | OR (95% CI) <sup>e</sup> | 1.00          | 0.68 (0.47-0.98)  | 0.82 (0.56-1.20)  | 0.86 (0.59-1.26) | 0.71       | 0.93    | 0.98 (0.87-1.10)        |                          |
|                         |       |                          |               |                   |                   |                  |            |         |                         |                          |
| Isovaleric acid (ng/mL) |       |                          |               |                   |                   |                  |            |         |                         |                          |
| PLCO                    |       | Definition               | <42.9         | 42.9 to <61.4     | 61.4 to <82.8     | ≥82.8            |            |         |                         | 0.21                     |
|                         | Women | N cases (%)              | 84 (36.1)     | 76 (32.6)         | 37 (15.9)         | 36 (15.5)        |            |         |                         |                          |
|                         |       | OR (95% CI) <sup>d</sup> | 1.00          | 1.09 (0.65-1.85)  | 0.56 (0.31-1.04)  | 0.75 (0.38-1.46) | 0.14       | 0.60    | 0.74 (0.53-1.04)        |                          |
|                         | Men   | N cases (%)              | 47 (17.9)     | 62 (23.7)         | 75 (28.6)         | 78 (29.8)        |            |         |                         |                          |
|                         |       | OR (95% CI) <sup>d</sup> | 1.00          | 0.82 (0.45-1.51)  | 1.04 (0.55-1.97)  | 0.73 (0.38-1.41) | 0.46       | 0.73    | 1.06 (0.76-1.48)        |                          |
| ATBC                    |       | Definition               | <63.5         | 63.5 to <80.1     | 80.1 to <101.0    | ≥101.0           |            |         |                         |                          |
|                         | Men   | N cases (%)              | 161 (26.9)    | 134 (22.4)        | 140 (23.4)        | 163 (27.3)       |            |         |                         |                          |
|                         |       | OR (95% CI) <sup>e</sup> | 1.00          | 0.83 (0.59-1.16)  | 0.84 (0.59-1.16)  | 0.97 (0.68-1.37) | 0.93       | 0.93    | 0.96 (0.76-1.22)        |                          |
|                         |       |                          |               |                   |                   |                  |            |         |                         |                          |

<sup>a</sup> Controls were alive and cancer-free at case diagnosis date and were incidence-density sampled and matched on age at randomization (+/- 5 years), sex, race, year of randomization, and season of blood draw

<sup>b</sup> Controls were alive and cancer-free at case diagnosis date and were incidence-density sampled and matched on age at randomization (+/- 5 years), baseline serum draw date (+/- 30 days), fasting status (<8 vs. ≥8 hours)

<sup>c</sup> P-interaction between log<sub>2</sub>-transformed bile acid measure and sex estimated in unconditional logistic regression model including sex as a covariate in the model

<sup>d</sup> Adjusted for age at baseline (years), BMI (kg/m<sup>2</sup>), smoking status (never, former, current), family history of CRC (no, yes), diabetes diagnosis (no, yes), alcohol drinker (no, yes), alcoholic intake (average number of drinks/day), hours spent in vigorous physical activity (none, <1 hour/wk, 1 hour/wk, 2 hours/wk, 3 hours/wk, ≥4 hours/wk), not processed red meat (g/day/1000 kcal), processed meat (g/day/1000 kcal), MPED equivalents of whole grains (oz/day/1000 kcal), total energy (kcal/day), education (high school graduate or less, some college or post high school training, college graduate or postgraduate), hormone replacement therapy status (women only; never, current, former)

<sup>e</sup> Adjusted for age at baseline (years), BMI (kg/m<sup>2</sup>), smoking intensity (cigarettes/day), diabetes diagnosis (no, yes), average number of alcoholic drinks per day, frequency of physical activity in leisure time (none, <1/wk, 1-2/wk, ≥3/wk), total red meat (g/day/1000 kcal), total processed meat (g/day/1000 kcal), whole grains (oz/day/100kcal), total energy (kcal/day), education (less than elementary school, some junior high school, completed junior high school, some senior high school, senior high school graduate)

Supplementary Table 7. Independent associations of bile acids (BAs) and short chain acids (SCFAs) with colorectal cancer in the PLCO Study (n=495 cases [n=233 women and n=262 men]; n=495 matched controls) by sex and the in the ATBC Study (n=598 cases; n=598 matched controls) selected using a stepwise procedure

| Study, Sex  | Metabolite            | Order entered | Model entry P <sup>a</sup> | Mutually adjusted OR (95% CI) | Mutually adjusted P <sup>a</sup> |
|-------------|-----------------------|---------------|----------------------------|-------------------------------|----------------------------------|
| PLCO, Women | Glycodeoxycholic acid | 1             | 0.0015                     | 1.29 (1.10-1.50) <sup>b</sup> | 0.0029                           |
|             | Isovaleric acid       | 2             | 0.0298                     | 0.68 (0.48-0.96) <sup>b</sup> | 0.0274                           |
| PLCO, Men   | Ursodeoxycholic acid  | 1             | 0.0216                     | 0.94 (0.89-0.99) <sup>b</sup> | 0.0224                           |
|             | Taurodeoxycholic acid | 2             | 0.0464                     | 1.06 (1.00-1.13) <sup>b</sup> | 0.0439                           |
| ATBC, Men   | Glycodeoxycholic acid | 1             | 0.0136                     | 1.10 (1.02-1.18) <sup>c</sup> | 0.0131                           |

<sup>a</sup> P-value for test obtained from conditional logistic regression model for a given metabolite (modeled on a continuous basis); all tests were two-sided. previously in model.

<sup>b</sup> Adjusted for age at baseline (years), BMI (kg/m<sup>2</sup>), smoking status (never, former, current), family history of CRC (no, yes), diabetes diagnosis (no, yes), alcohol drinker (no, yes), alcoholic intake (average number of drinks/day), hours spent in vigorous physical activity (none, <1 hour/wk, 1 hour/wk, 2 hours/wk, 3 hours/wk, ≥4 hours/wk), not processed red meat (g/day/1000 kcal), processed meat (g/day/1000 kcal), MPED equivalents of whole grains (oz/day/1000 kcal), total energy (kcal/day), education (high school graduate or less, some college or post high school training, college graduate or postgraduate), hormone replacement therapy status (women only; never, current, former), and all other metabolites

<sup>c</sup> Adjusted for age at baseline (years), BMI (kg/m<sup>2</sup>), smoking intensity (cigarettes/day), diabetes diagnosis (no, yes), average number of alcoholic drinks per day, frequency of physical activity in leisure time (none, <1/wk, 1-2/wk, ≥3/wk), total red meat (g/day/1000 kcal), total processed meat (g/day/1000 kcal), whole grains (oz/day/100kcal), total energy (kcal/day), education (less than elementary school, some junior high school, completed junior high school, some senior high school, senior high school graduate), and all other metabolites



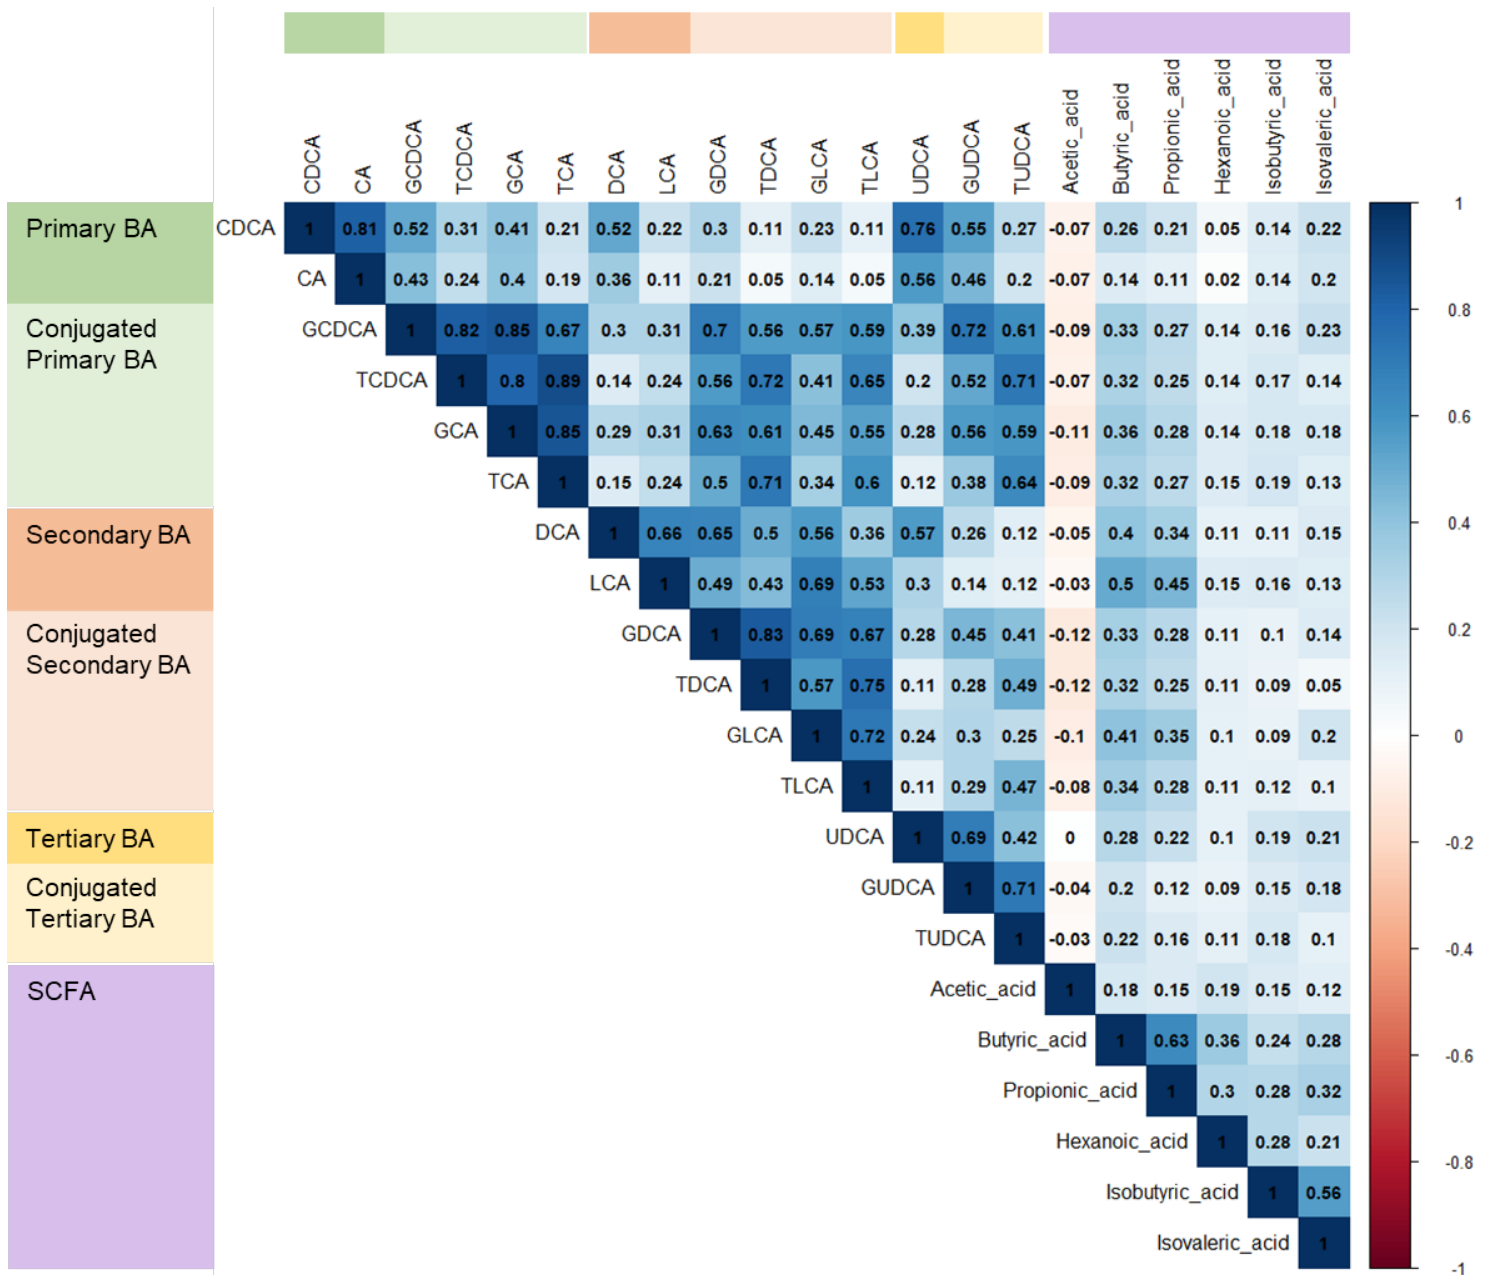

**Supplementary Figure 1.** Spearman rank correlation plot for BAs and SCFAs among controls in the PLCO study (n=495); abbreviations: BA, bile acid; chenodeoxycholic acid, CDCA; CA, cholic acid; GCDCA, glycochenodeoxycholic acid; TCDC, taurochenodeoxycholic acid; GCA, glycocholic acid; TCA, taurocholic acid; DCA, deoxycholic acid; LCA, lithocholic acid; GDCA, glycodeoxycholic acid; TDCA, taurodeoxycholic acid; GLCA, glycolithocholic acid; TLCA, tauroolithocholic acid; UDCA, ursodeoxycholic acid; GUDCA, glyoursodeoxycholic acid; TUDCA, taoursodeoxycholic acid; SCFA, short-chain fatty acid

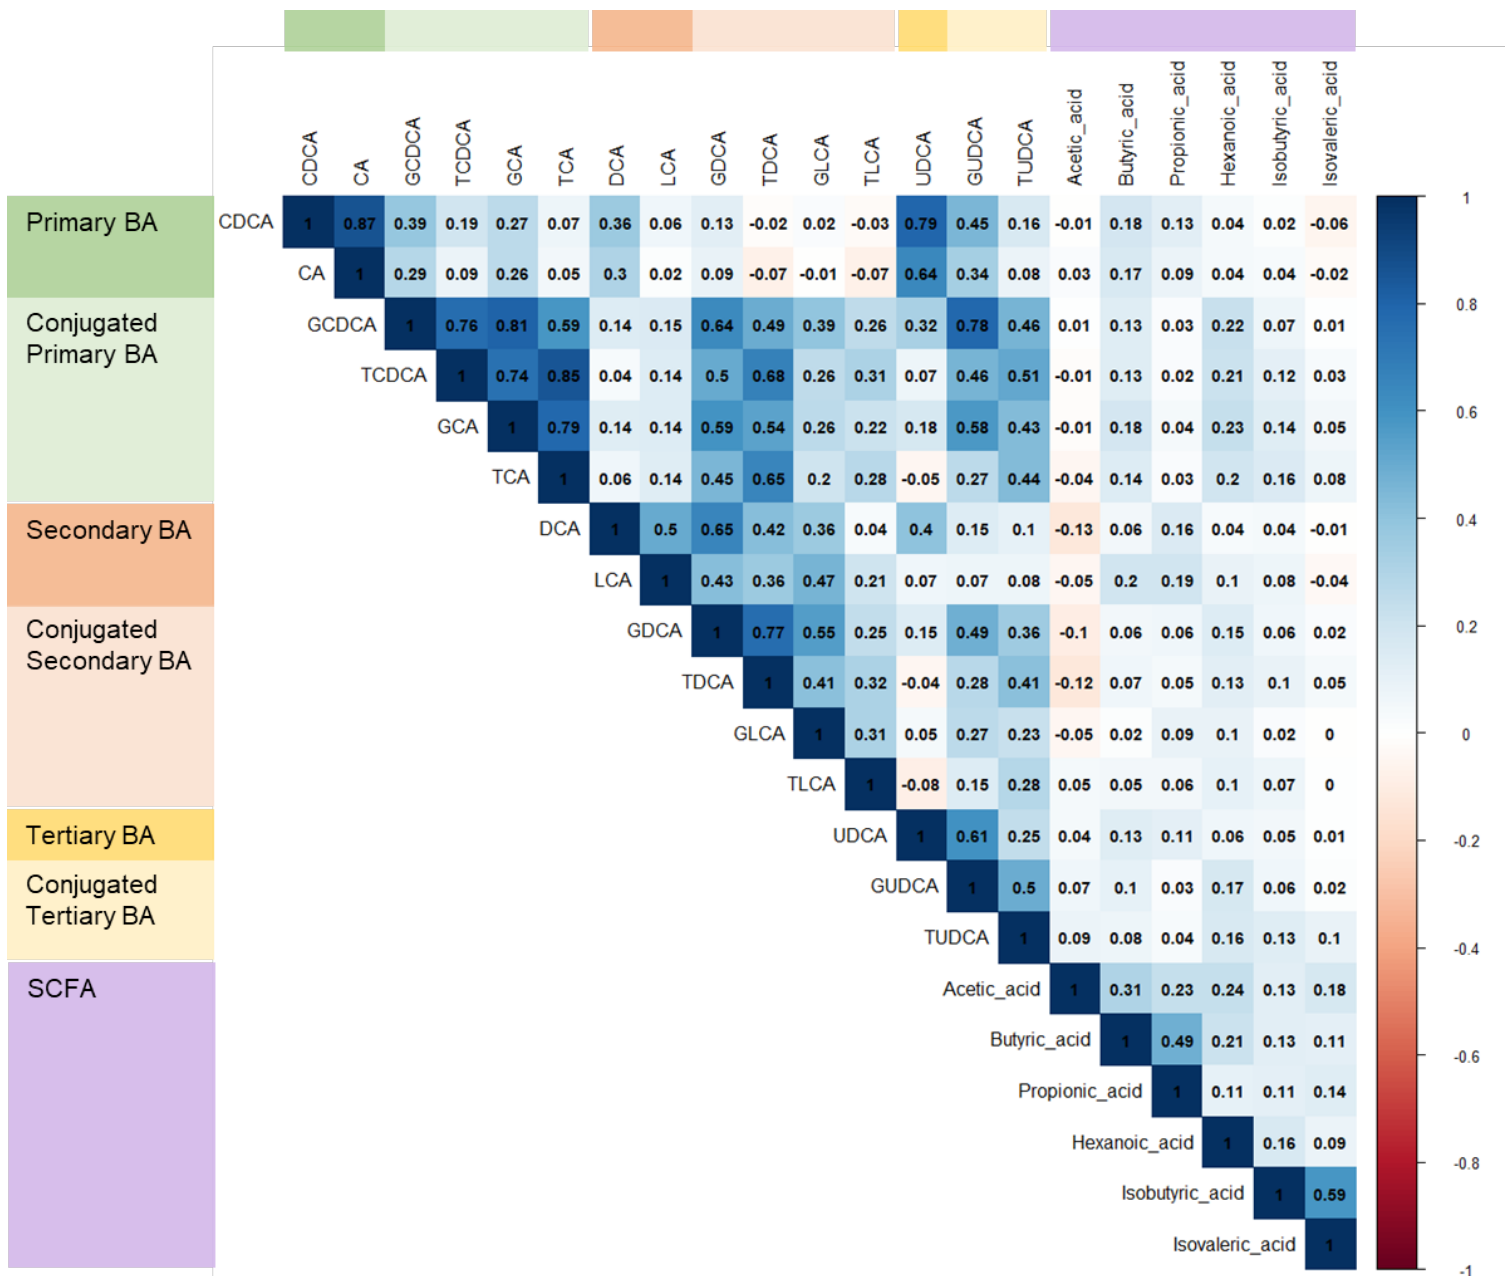

**Supplementary Figure 2.** Spearman rank correlation plot for BAs and SCFAs among controls in the ATBC study (n=598); abbreviations: BA, bile acid; chenodeoxycholic acid, CDCA; CA, cholic acid; GCDCA, glycochenodeoxycholic acid; TCDCa, taurochenodeoxycholic acid; GCA, glycocholic acid; TCA, taurocholic acid; DCA, deoxycholic acid; LCA, lithocholic acid; GDCA, glycodeoxycholic acid; TDCA, taurodeoxycholic acid; GLCA, glycolithocholic acid; TLCA, tauroolithocholic acid; UDCA, ursodeoxycholic acid; GUDCA, glyoursodeoxycholic acid; TUDCA, taoursodeoxycholic acid; SCFA, short-chain fatty acid
